# Supplementary material
Source: PubMed Central journal article supplement (PMC6646538)
Supplement: ao8b01713_si_001.pdf [file ao8b01713_si_001.pdf]

# Exploring Exercise- and Context-Induced Peptide Changes in Mice by Quantitative Mass Spectrometry

Sarah E. Dowd<sup>†‡</sup>, Martina L. Mustroph<sup>‡</sup>, Elena V. Romanova<sup>†</sup>, Bruce R. Southey<sup>§</sup>, Heinrich Pinardo<sup>¶</sup>, Justin S. Rhodes<sup>⊥¶</sup>, Jonathan V. Sweedler<sup>†¶\*</sup>

<sup>†</sup>Department of Chemistry, <sup>‡</sup>Neuroscience Program, <sup>¶</sup>Beckman Institute, <sup>§</sup>Department of Animal Sciences, and <sup>⊥</sup>Department of Psychology, University of Illinois at Urbana–Champaign, Urbana, Illinois 61801, United States

<sup>‡</sup>Both authors contributed equally to this work.

## Supporting Information

### Contents:

**Figure S1.** Representative MALDI MS spectra for the peptide extract collected from an individual animal ..... S-2

**Table S1.** Identification details for peptides differentially detected in either the amygdala or dentate gyrus by stable isotopic labeling..... S-3

### NOTE: The following are provided as separate Excel files:

**Table S2.** Peptides identified from the dentate gyrus extract using succinic anhydride labeling and not exhibiting a significant level change in response to exercise.

**Table S3.** Peptides identified from the amygdala extract using succinic anhydride labeling and not exhibiting a significant level change from exposure to a cocaine-associated context.

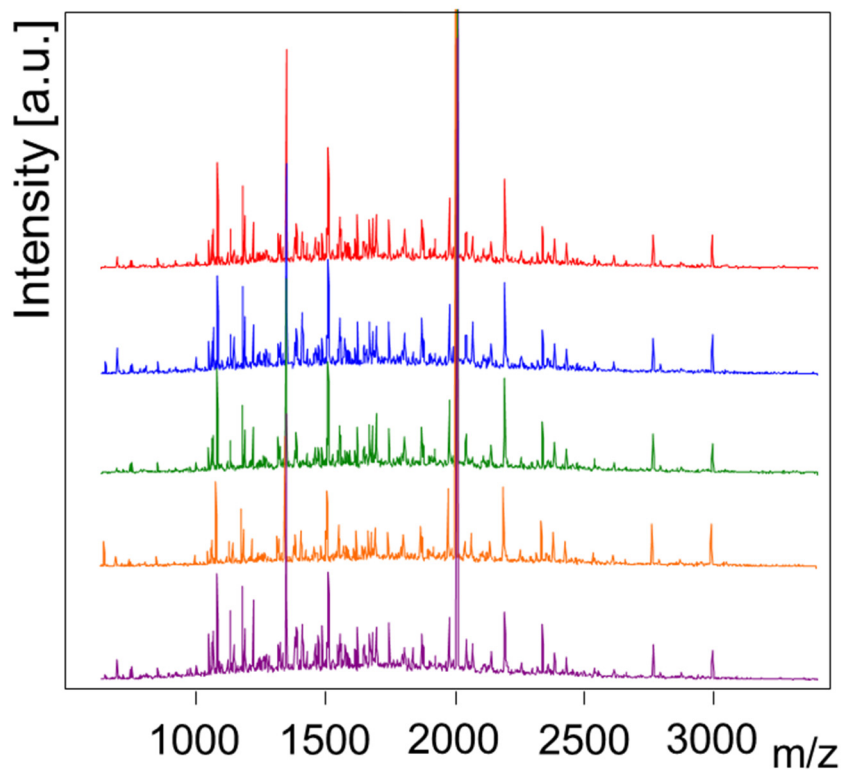

**Figure S1:** Representative MALDI MS spectra for the peptide extract collected from an individual animal. Each spectrum represents the technical replicates from 5 spots generated with the peptide extract spiked with the internal standard (MW 2960 Da) co-crystallized with  $\alpha$ -cyano-4-hydroxycinnamic acid matrix.

**Table S1.** Identification details for peptides differentially detected in either the amygdala (Am) or dentate gyrus (DG) by stable isotopic labeling.

| Protein Accession | Protein name | Peptide                                      | -10lgP | Mass     | ppm   | Start | End | PTM | Brain localization |
|-------------------|--------------|----------------------------------------------|--------|----------|-------|-------|-----|-----|--------------------|
| A8DUK4            | A8DUK4_MOUSE | K.V(+100.07)VAGVAAALAHK(+100.07)YH           | 54.89  | 1605.923 | -63   | 134   | 147 | SA  | Am                 |
| A8DUK4            | A8DUK4_MOUSE | K.V(+104.09)VAGVAAALAHK(+104.09)YH           | 44.55  | 1613.963 | -69.5 | 134   | 147 | HAS | Am                 |
| F6ZIA4            | F6ZIA4_MOUSE | A(+42.01)SQK(+100.02)RPSQRSK(+100.02).Y      | 19.48  | 1513.748 | -3    | 1     | 11  | SA  | DG                 |
| F6ZIA4            | F6ZIA4_MOUSE | M.D(+100.02)HARHGFLPRHRDTGILD.S              | 47     | 2212.089 | -5.1  | 20    | 37  | SA  | DG                 |
| F6ZIA4            | F6ZIA4_MOUSE | G.S(+104.04)LPQK(+104.04)SQHGRTQDENPVVH.F    | 50.01  | 2364.155 | -4.5  | 67    | 85  | SA  | DG                 |
| F6ZIA4            | F6ZIA4_MOUSE | G.S(+100.02)LPQK(+100.02)SQHGRTQDENPVVHF.F   | 45.84  | 2503.173 | -2.6  | 67    | 86  | SA  | DG                 |
| P01942            | HBA_MOUSE    | T.L(+100.07)ASHHPADFTPAVH.A                  | 90.48  | 1598.802 | -31.9 | 110   | 123 | SA  | Am                 |
| P01942            | HBA_MOUSE    | T.L(+104.09)ASHHPADFTPAVH.A                  | 87.33  | 1602.822 | -28.4 | 110   | 123 | HAS | Am                 |
| P01942            | HBA_MOUSE    | L.L(+100.07)VTLASHHPADFTPAVH.A               | 90.01  | 1912.002 | -25   | 107   | 123 | SA  | Am                 |
| P01942            | HBA_MOUSE    | L.L(+104.09)VTLASHHPADFTPAVH.A               | 85.58  | 1916.022 | -23.1 | 107   | 123 | HAS | Am                 |
| P01942            | HBA_MOUSE    | L.L(+104.09)VTLASHHPADFTPAVHASLDK(+104.09).F | 83.96  | 2534.387 | -35.8 | 107   | 128 | HAS | Am                 |
| P04370            | MBP_MOUSE    | R.H(+100.02)GFLPRHRDTG.I                     | 17.29  | 1391.669 | -5.1  | 158   | 168 | SA  | DG                 |
| P04370            | MBP_MOUSE    | M.A(+42.01)SQK(+100.02)RPSQRSK(+100.02).Y    | 19.48  | 1513.748 | -3    | 135   | 145 | SA  | DG                 |
| P60710            | ACTB_MOUSE   | G.F(+100.07)AGDDAPRAVFPSPVGRPRHQG.V          | 79.67  | 2449.279 | -38.5 | 21    | 42  | SA  | Am                 |
| P63260            | ACTG_MOUSE   | L.R(+100.02)VAPEEHPVL.L                      | 40.82  | 1245.635 | -4.2  | 95    | 104 | SA  | DG                 |

(-10lgP) - indicates the statistical significance of the peptide-spectrum match; all included scores are above the threshold determined by FDR of 5%

Mass - theoretical monoisotopic mass of a peptide

ppm - parts per million

Start/End - indicates the numerical position of the first and last amino acid of the peptide on the corresponding protein sequence

SA - succinic anhydride

HSA - heavy succinic anhydride
